# Supplementary material
Source: PubMed Central journal article supplement (PMC5961031)
Supplement: supp_RA117.001513_134747_3_supp_107859_p6dl88.pdf [file supp_RA117.001513_134747_3_supp_107859_p6dl88.pdf]

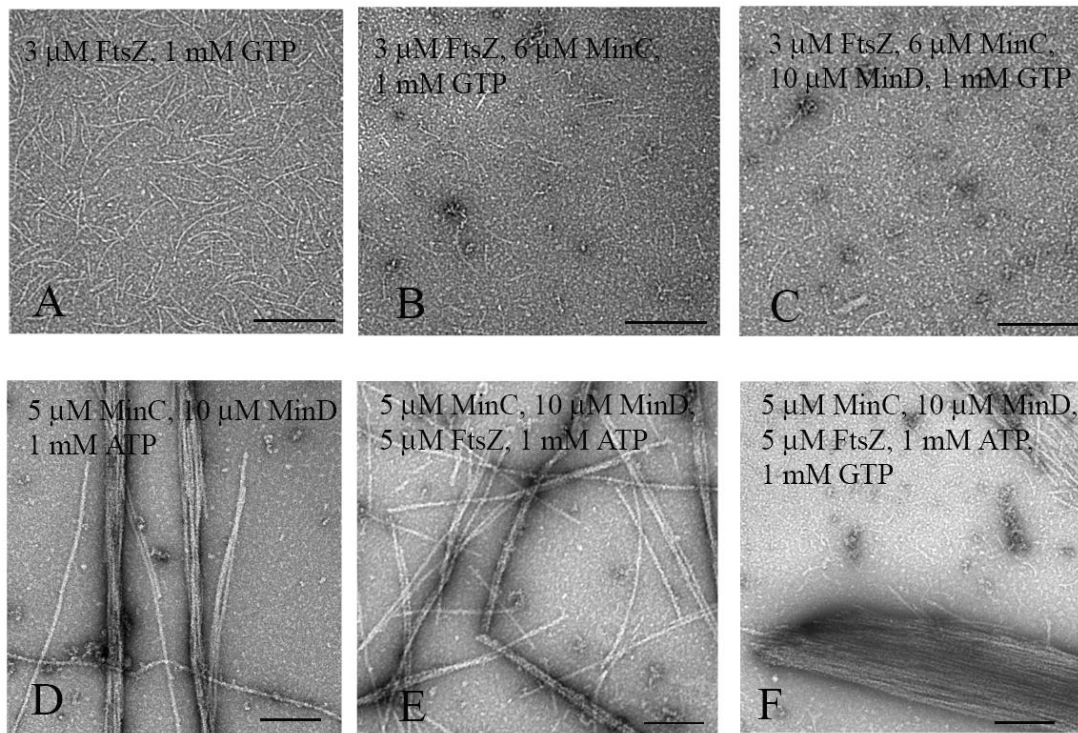

Fig. S1. EM images of FtsZ and MinC-MinD-FtsZ copolymers at different conditions. (A-C) 3  $\mu\text{M}$  FtsZ assembles into single filaments in the presence of 1 mM GTP (A) and FtsZ filaments are largely eliminated with 6  $\mu\text{M}$  MinC (B) and with 6  $\mu\text{M}$  MinC and 10  $\mu\text{M}$  MinD without ATP. (D-F) 5  $\mu\text{M}$  MinC and 10  $\mu\text{M}$  MinD assembles into bundles in the presence of 1 mM ATP (D). There is no significant change when adding 5  $\mu\text{M}$  FtsZ without GTP (E), but bundles formed with 5  $\mu\text{M}$  FtsZ plus 1 mM GTP (F). The bar is 200 nm. The reaction solution is 50 mM HEPES, pH 7.5, 100 mM KAc and 5 mM MgAc.

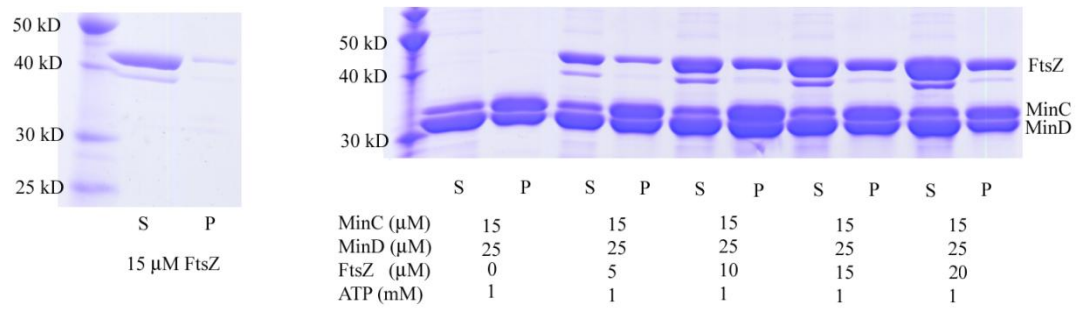

Fig. S2. Sedimentation analysis of FtsZ binding to MinC-MinD copolymers. The left-hand panel shows sedimentation of FtsZ alone. It is almost entirely in the supernatant (S). The right-hand panel shows constant MinC and MinD plus ATP, with increasing FtsZ without GTP. The amount of FtsZ in the pellet is constant from 10-20  $\mu\text{M}$  FtsZ, suggesting that there are a limited number of binding sites on the MinC-MinD copolymers that are saturated at 10  $\mu\text{M}$  FtsZ.
